Nephrol Dial Transplant (2011) 26: 3286–3295

doi: 10.1093/ndt/gfr323

Advance Access publication 15 June 2011

## Epidemiology and prognostic significance of chronic kidney disease in the elderly—the Three-City prospective cohort study

Benedicte Stengel<sup>1,2</sup>, Marie Metzger<sup>1,2</sup>, Marc Froissart<sup>1,3</sup>, Muriel Rainfray<sup>4</sup>, Claudine Berr<sup>5,6</sup>, Christophe Tzourio<sup>7</sup> and Catherine Helmer<sup>8,9</sup>

<sup>1</sup>Inserm U1018, CESP, Villejuif, France, <sup>2</sup>UMR 1018, Paris-Sud University, Villejuif, France, <sup>3</sup>Paris Descartes University, Paris, France, <sup>4</sup>Clinical Geriatry Department, Bordeaux University Hospital, Bordeaux, France, <sup>5</sup>Inserm U888, Montpellier, France, <sup>6</sup>Montpellier 1 University, Montpellier, France, <sup>7</sup>Inserm, U708, Paris, France, <sup>8</sup>Inserm U897, Bordeaux, France and <sup>9</sup>Victor Segalen Bordeaux 2 University, Bordeaux, France

Correspondence and offprint requests to: Benedicte Stengel; E-mails: benedicte.stengel@inserm.fr

### Abstract

**Background.** Little is known about normal kidney function level and the prognostic significance of low estimated glomerular filtration rate (eGFR) in the elderly.

**Methods.** We determined age and sex distribution of eGFR with both the Modification of Diet in Renal Disease (MDRD) study and the Chronic Kidney Disease Epidemiology Collaboration (CKD-EPI) equations in 8705 community-dwelling

elderly aged  $\geq 65$  years and studied its relation to 6-year mortality. In a subsample of 1298 subjects examined at 4 years, we assessed annual eGFR decline and clinically relevant markers including microalbuminuria (3–30 mg/mmol creatinine) with diabetes, proteinuria  $\geq 50$  mg/mmol, haemoglobin  $< 11$  g/L or resistant hypertension despite three drugs.

**Results.** Median (interquartile range) MDRD eGFR was 78 (68–89) mL/min/1.73m<sup>2</sup> in men and 74 (65–83) in women;

there were 79 (68–87) and 77 (67–85) for CKD-EPI eGFR, respectively. Prevalence of MDRD eGFR <60 mL/min/1.73m<sup>2</sup> was 13.7% and of CKD-EPI eGFR was 12.9%. After adjustment for several confounders, only those with an eGFR <45 mL/min/1.73m<sup>2</sup> had significantly higher all-cause and cardiovascular mortality than those with an eGFR of 75–89 mL/min/1.73m<sup>2</sup> whatever the equation. In the subsample men and women with an MDRD eGFR of 45–59 mL/min/1.73m<sup>2</sup>, 15 and 13% had at least one clinical marker and 15 and 3% had microalbuminuria without diabetes, respectively; these percentages were 41 and 21% and 23 and 10% in men and women with eGFR <45, respectively. Mean MDRD eGFR decline rate was steeper in men than in women, 1.75 versus 1.41 mL/min/1.73m<sup>2</sup>/year.

**Conclusions.** Moderately decreased eGFR is more often associated with clinical markers in men than in women. In both sexes, eGFR <45 mL/min/1.73m<sup>2</sup> is related to poor outcomes. The CKD-EPI and the MDRD equations provide very similar prevalence and long-term risk estimates in this elderly population.

**Keywords:** chronic kidney disease; elderly; glomerular filtration rate; mortality; proteinuria; anaemia

**Introduction**

Chronic kidney disease (CKD) as defined by the Kidney Disease Outcome Quality Initiative (K/DOQI) is increasingly recognized as a public health priority and targeted in prevention programmes [1–3]. Routine reporting of estimated glomerular filtration rate (eGFR) has led to the identification of up to nearly half of the elderly as having CKD [4–7] with increased referrals to nephrologists [8, 9]. Because CKD diagnosis in many of these subjects is based only on either microalbuminuria or moderately decreased eGFR (i.e. 30–59 mL/min/1.73m<sup>2</sup>), controversy exists about its clinical relevance [10–17], especially given how

little is known about normal kidney function level [18, 19] and the epidemiology of CKD in the elderly [20, 21].

More information is needed about the prevalence of clinically significant kidney markers such as clinical proteinuria [22], resistant hypertension [23] or anaemia [24, 25] in the older people [21, 26]. Data on eGFR change over time are also needed to better define rapid decline in this population [27–29]. Moreover, although several studies have shown increased mortality risk with decreasing eGFR [30–34], others suggest that age attenuates these associations [35–39]. Finally, use of a creatinine enzymatic assay and development of new equations improved eGFR assessment, but while the Chronic Kidney Disease Epidemiology Collaboration (CKD-EPI) [40] equation has shown to better categorize middle-aged individuals with respect to long-term outcomes compared with the Modification of Diet in Renal Disease (MDRD) study equation [41], distribution of eGFR values according to one another and risk implications in the oldest are unknown [42].

We therefore determined age- and sex-specific eGFR using both the MDRD and CKD-EPI equations in community-dwelling people aged 65 years and older participating in the Three-City (3C) cohort study and studied their relations to 6-year all-cause and cardiovascular mortality risks. In a subsample, we also assessed eGFR decline at 4 years and CKD markers.

**Materials and methods**

*Study design and participants*

The 3C study is a community-based prospective cohort that included non-institutionalized individuals aged 65 years or older randomly selected from the electoral rolls of Bordeaux, Dijon and Montpellier (France) from March 1999 through March 2001. The acceptance rate of 37% yielded a sample of 9294 participants. Details of the study design are reported elsewhere [43]. Here, we studied 8705 participants with baseline serum creatinine and mortality data for 6 years; a subsample of 1298 from Bordeaux was also seen at 4 years to assess eGFR decline and CKD markers (Figure 1).

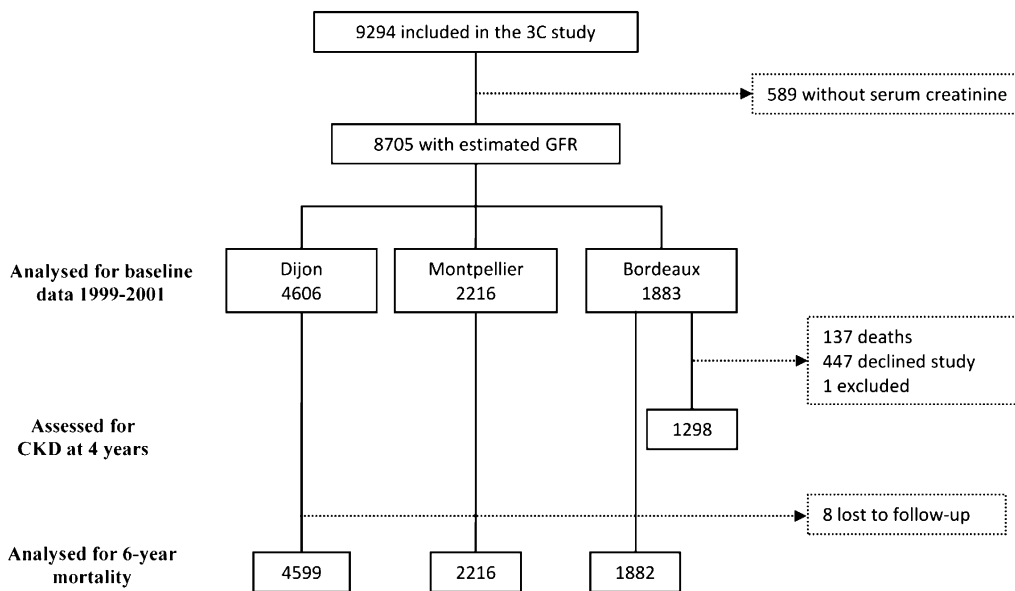

**Fig. 1.** Three-City study flow chart.

### Information

Baseline data came from face-to-face interviews and physical examination. Cardiovascular diseases and cardiorenal risk factors were recorded in detail. Open questions about surgery, hospitalization, treatment and 100% health insurance benefits for severe illness in the last 2 years provided a history of kidney diseases and nephrectomy. At both baseline and 4 years, medication use was recorded and coded according to the World Health Organization's Anatomical Therapeutic Chemical classification [44]; height and weight were measured and body mass index (BMI) was calculated; seated blood pressure (BP) was measured twice after 5-min rest and averaged. Hypertension was defined by a mean systolic BP  $\geq 140$  or diastolic BP  $\geq 90$  mmHg [45] or by the use of antihypertensive drugs. Resistant hypertension was defined as a mean systolic BP  $\geq 140$  or diastolic BP  $\geq 90$  mmHg, despite the use of at least three antihypertensive drugs for all participants except those with diabetes or CKD as defined below; thresholds for them were  $\geq 130$  or 80 mmHg [23]. Diabetes was either self-reported or defined as fasting glucose  $\geq 7$  mmol/L or nonfasting  $\geq 11$  mmol/L (in 1% of the participants) or antidiabetic drug treatment. Fasting plasma cholesterol was also measured.

### Assessment of kidney function and CKD markers

Serum creatinine was measured with the Jaffe method in a single laboratory at baseline and in a different one at 4 years. In order to standardize creatinine values, 1720 frozen serum samples at baseline and 325 at 4 years were remeasured in a single laboratory with an isotope dilution mass spectrometry (IDMS) traceable enzymatic assay previously shown to provide very reliable eGFR compared to measured GFR [25]. We then developed equations relating the Jaffe and IDMS-traceable creatinine and standardized all baseline (1) and follow-up (2) values as follows: (1)  $S_{\text{crIDMS}} = 0.86 \times S_{\text{crJaffe}} + 4.40$ ; (2)  $S_{\text{crIDMS}} = 0.87 \times S_{\text{crJaffe}} + 7.85$ .

We calculated eGFR in mL/min/1.73m<sup>2</sup> with both the MDRD and the CKD-EPI equations without correction for ethnicity (which was unavailable) [40, 41]. At the 4-year follow-up, blood and urine were collected in 1298 participants and analyzed for haemoglobin (Hb), urinary protein:creatinine ratio (PCR) and albumin:creatinine ratio (ACR) when proteinuria was  $< 300$  mg/L. Dipstick haematuria and leukocyturia were recorded. Anaemia was defined as Hb  $< 11$  g/dL [24]. Clinical proteinuria was defined as a PCR  $> 50$  mg/mmol and microalbuminuria as an ACR of 3–30 mg/mmol. These data were missing for 40 participants. In the subsample at 4 years, we used the UK National Institute for Health and Clinical Excellence (NICE) [22] and 2009 KDIGO Controversies Conference [46] recommended modifications to define CKD Stages 1–2 as a mean eGFR  $\geq 60$  mL/min/1.73m<sup>2</sup> with ACR  $\geq 3$  mg/mmol or clinical proteinuria; Stage 3A as an eGFR of 45–59 and Stage 3B or higher as eGFR  $< 45$ .

### Mortality

Six-year mortality was assessed by active follow-up of all participants. It remained unknown for only eight participants. Causes of death were ascertained by an adjudication committee using all available medical data from hospitals, family physicians or specialists and proxy interviews as reported earlier [47].

### Statistical analysis

We compared baseline characteristics between the participants with and without ( $n = 589$ ) creatinine values, with and without the 4-year follow-up and with and without CKD risk factors—obesity, BP  $\geq 160/100$ , diabetes, history of cardiovascular disease—or self-reported kidney disease. Subjects without creatinine values were older than those with (76.6 versus 74.2 years), had significantly more cardiovascular diseases but did not differ for other CKD risk factors after adjustment for age (data not shown). We calculated mean, median, interquartile range and 5th percentile for both MDRD and CKD-EPI eGFR, by sex and 5-year age group, in all participants and in those with and without CKD or risk factors. Distribution by eGFR stratum was compared between the two equations. We also provided these values for serum creatinine. Adjusted all-cause and cardiovascular mortality hazard ratios (HRs) associated with MDRD and CKD-EPI eGFR per 15 mL/min/1.73m<sup>2</sup> stratum were then estimated in the overall population and by sex with Cox models and eGFR of 75–89 as the reference category. The eight participants who were lost to follow-up were excluded. Proportional hazard assumption was checked by examining Cox model residuals. An annual eGFR slope in mL/min/1.73m<sup>2</sup>/year was calculated for each participant as the difference between baseline and 4-year values divided by exact follow-up time. We used a general linear model to estimate adjusted eGFR slopes (SAS GLM procedure,

lsmeans statement with obsmargin option) and 95% confidence intervals, by sex, age, hypertension and diabetes status, and mean eGFR values. The percentages of participants with eGFR decline rate  $> 4$  mL/min/1.73m<sup>2</sup> are also shown according to these factors [3]. Finally, we studied the prevalence of each kidney marker according to MDRD eGFR at 4 years. We also evaluated the prevalence of CKD stages at 4 years by sex and diabetes status, as well as the distribution of at least one clinical marker (among microalbuminuria associated with diabetes, clinical proteinuria, resistant hypertension or anaemia), isolated microalbuminuria and low eGFR alone by CKD stage. Statistical analyses were performed with SAS 9.2 (SAS Institute, Cary, NC) and R 2.8.1 (R Development Core Team, 2009).

**Table 1.** Baseline characteristics of the 3C study participants<sup>a</sup>

|                                                     | Overall<br>( <i>N</i> = 8705) | CKD risk factors or<br>self-reported kidney<br>disease |                           | Subsample<br>with 4-year<br>follow-up<br>( <i>N</i> = 1298) |
|-----------------------------------------------------|-------------------------------|--------------------------------------------------------|---------------------------|-------------------------------------------------------------|
|                                                     |                               | No<br>( <i>N</i> = 3768)                               | Yes<br>( <i>N</i> = 4937) |                                                             |
| Age in years                                        | 74.3 $\pm$ 5.5                | 73.3 $\pm$ 5.2                                         | 75.1 $\pm$ 5.7            | 74.3 $\pm$ 4.9                                              |
| Women                                               | 60.5                          | 67.8                                                   | 54.9                      | 63.5                                                        |
| Income<br>(€ per month)                             |                               |                                                        |                           |                                                             |
| <760                                                | 5.3                           | 4.7                                                    | 5.7                       | 8.2                                                         |
| 760–1499                                            | 28.8                          | 27.5                                                   | 29.7                      | 35.0                                                        |
| 1499–2299                                           | 26.8                          | 27.1                                                   | 26.5                      | 23.0                                                        |
| >2300                                               | 33.1                          | 34.5                                                   | 32.1                      | 28.2                                                        |
| No response                                         | 6.0                           | 6.1                                                    | 6.0                       | 5.6                                                         |
| School education                                    | 63.1                          | 60.8                                                   | 64.7                      | 60.2                                                        |
| < 9 years                                           |                               |                                                        |                           |                                                             |
| Smoking                                             |                               |                                                        |                           |                                                             |
| No                                                  | 61.2                          | 65.6                                                   | 57.8                      | 64.8                                                        |
| Yes, past                                           | 33.2                          | 28.0                                                   | 37.3                      | 29.8                                                        |
| Yes, present                                        | 5.6                           | 6.4                                                    | 4.9                       | 5.3                                                         |
| Hypercholesterolaemia                               |                               |                                                        |                           |                                                             |
| No                                                  | 43.4                          | 43.8                                                   | 43.1                      | 42.4                                                        |
| Yes, not treated                                    | 26.5                          | 30.5                                                   | 23.5                      | 26.1                                                        |
| Yes, treated                                        | 30.1                          | 25.8                                                   | 33.4                      | 31.4                                                        |
| Diabetes <sup>b</sup>                               | 9.7                           | –                                                      | 17.1                      | 9.7                                                         |
| Hypertension <sup>c</sup>                           | 77.3                          | 61.3                                                   | 89.6                      | 77.8                                                        |
| BP $\geq 160/100$                                   | 26.3                          | NA                                                     | 46.4                      | 23.7                                                        |
| BMI $> 30$ kg/m <sup>2</sup>                        | 13.2                          | NA                                                     | 23.3                      | 17.4                                                        |
| History of<br>cardiovascular<br>disease             | 29.6                          | NA                                                     | 52.1                      | 29.0                                                        |
| Self-reported<br>kidney disease                     | 0.7                           | NA                                                     | 1.3                       | 0.7                                                         |
| Use of renin–<br>angiotensin<br>system<br>inhibitor | 22.9                          | 13.9                                                   | 29.7                      | 22.6                                                        |
| Serum creatinine<br>( $\mu$ mol/L)                  | 76.4 $\pm$ 18.2               | 73.6 $\pm$ 14.4                                        | 78.5 $\pm$ 20.4           | 73.8 $\pm$ 17.3                                             |
| MDRD eGFR in<br>mL/min/1.73m <sup>2</sup>           | 76.0 $\pm$ 15.6               | 76.9 $\pm$ 14.5                                        | 75.2 $\pm$ 16.4           | 78.3 $\pm$ 16.3                                             |
| $\geq 90$                                           | 16.7                          | 16.9                                                   | 16.6                      | 20.7                                                        |
| 60–89                                               | 69.6                          | 73.2                                                   | 66.8                      | 67.6                                                        |
| 30–59                                               | 13.4                          | 9.8                                                    | 16.2                      | 11.4                                                        |
| <30                                                 | 0.3                           | 0.1                                                    | 0.4                       | 0.2                                                         |
| CKDEPI eGFR in<br>mL/min/1.73m <sup>2</sup>         | 75.4 $\pm$ 13.2               | 76.9 $\pm$ 11.9                                        | 74.3 $\pm$ 14.0           | 77.2 $\pm$ 12.9                                             |
| $\geq 90$                                           | 10.2                          | 11.4                                                   | 9.3                       | 12.9                                                        |
| 60–89                                               | 76.9                          | 79.9                                                   | 74.6                      | 76.9                                                        |
| 30–59                                               | 12.6                          | 8.6                                                    | 15.6                      | 9.9                                                         |
| <30                                                 | 0.3                           | 0.1                                                    | 0.5                       | 0.4                                                         |

<sup>a</sup>Values are means  $\pm$  SD or percent.

<sup>b</sup>Diabetes was either self-reported or defined as fasting glycaemia  $\geq 7$  mmol/L or nonfasting glycaemia  $\geq 11$  mmol/L or antidiabetic drug treatment.

<sup>c</sup>Hypertension defined as BP  $\geq 140/90$  mmHg or antihypertensive drug treatment (stage 2 defined as BP  $\geq 160/100$  mmHg with or without antihypertensive drug treatment) [45]. NA, not applicable.

**Table 2.** Age- and sex-specific eGFR values in mL/min/1.73m<sup>2</sup> calculated with the MDRD and CKD-EPI equations in all participants and by subgroup<sup>a</sup>

|                     | All 3C participants |      |            |                                 |    |       | Participants without CKD risk factors <sup>b</sup><br>or self-reported kidney disease |           |                                 |    |       | Participants with CKD risk factors <sup>b</sup><br>or self-reported kidney disease |           |                                 |    |       |
|---------------------|---------------------|------|------------|---------------------------------|----|-------|---------------------------------------------------------------------------------------|-----------|---------------------------------|----|-------|------------------------------------------------------------------------------------|-----------|---------------------------------|----|-------|
|                     | Age                 | N    | Mean ± Std | Median<br>(minimum–<br>maximum) | P5 | Q1–Q3 | N                                                                                     | Mean ± SD | Median<br>(minimum–<br>maximum) | P5 | Q1–Q3 | N                                                                                  | Mean ± SD | Median<br>(minimum–<br>maximum) | P5 | Q1–Q3 |
| <b>MDRD eGFR</b>    |                     |      |            |                                 |    |       |                                                                                       |           |                                 |    |       |                                                                                    |           |                                 |    |       |
| All                 | 65–69               | 2277 | 79 ± 15    | 78 (17–168)                     | 58 | 69–88 | 1217                                                                                  | 79 ± 14   | 78 (30–168)                     | 58 | 69–87 | 1060                                                                               | 79 ± 15   | 78 (17–132)                     | 57 | 70–89 |
|                     | 70–74               | 2808 | 77 ± 15    | 77 (25–176)                     | 53 | 68–86 | 1248                                                                                  | 78 ± 14   | 77 (30–154)                     | 56 | 69–86 | 1560                                                                               | 77 ± 16   | 77 (25–176)                     | 51 | 68–86 |
|                     | 75–79               | 2307 | 74 ± 15    | 73 (20–135)                     | 51 | 64–84 | 902                                                                                   | 75 ± 14   | 74 (30–132)                     | 53 | 65–84 | 1405                                                                               | 74 ± 16   | 73 (20–135)                     | 49 | 63–84 |
|                     | 80–84               | 884  | 71 ± 17    | 71 (18–130)                     | 45 | 61–82 | 287                                                                                   | 74 ± 16   | 73 (28–120)                     | 51 | 63–83 | 597                                                                                | 70 ± 17   | 69 (18–130)                     | 43 | 59–82 |
|                     | 85–89               | 356  | 68 ± 17    | 68 (18–121)                     | 40 | 57–80 | 97                                                                                    | 72 ± 16   | 71 (37–121)                     | 46 | 59–82 | 259                                                                                | 67 ± 17   | 67 (18–116)                     | 37 | 56–77 |
|                     | ≥90                 | 73   | 65 ± 16    | 66 (26–101)                     | 40 | 51–76 | 17                                                                                    | 69 ± 14   | 69 (44–97)                      | 44 | 60–78 | 56                                                                                 | 64 ± 17   | 63 (26–101)                     | 39 | 51–75 |
|                     | All                 | 8705 | 76 ± 16    | 75 (17–176)                     | 51 | 66–85 | 3768                                                                                  | 77 ± 15   | 76 (28–168)                     | 54 | 67–85 | 4937                                                                               | 75 ± 16   | 75 (17–176)                     | 49 | 65–85 |
| Men                 | 65–69               | 900  | 83 ± 15    | 81 (17–137)                     | 60 | 73–92 | 399                                                                                   | 84 ± 15   | 82 (44–137)                     | 62 | 73–93 | 501                                                                                | 82 ± 16   | 81 (17–130)                     | 59 | 72–90 |
|                     | 70–74               | 1170 | 80 ± 16    | 80 (28–154)                     | 53 | 70–89 | 416                                                                                   | 82 ± 15   | 81 (45–154)                     | 61 | 71–89 | 754                                                                                | 79 ± 16   | 80 (28–129)                     | 51 | 69–89 |
|                     | 75–79               | 857  | 76 ± 17    | 75 (20–135)                     | 50 | 65–87 | 269                                                                                   | 77 ± 15   | 77 (37–132)                     | 55 | 68–86 | 588                                                                                | 75 ± 17   | 74 (20–135)                     | 48 | 63–87 |
|                     | 80–84               | 339  | 75 ± 18    | 75 (19–130)                     | 46 | 62–87 | 90                                                                                    | 79 ± 17   | 78 (35–120)                     | 50 | 68–88 | 249                                                                                | 73 ± 18   | 73 (19–130)                     | 43 | 60–87 |
|                     | 85–89               | 152  | 70 ± 18    | 69 (18–116)                     | 41 | 59–81 | 34                                                                                    | 74 ± 15   | 72 (48–112)                     | 51 | 63–82 | 118                                                                                | 69 ± 19   | 68 (18–116)                     | 35 | 57–81 |
|                     | ≥90                 | 23   | 64 ± 15    | 63 (41–101)                     | 43 | 51–73 | 4                                                                                     | 64 ± 5    | 64 (59–69)                      | 59 | 60–69 | 19                                                                                 | 64 ± 16   | 63 (41–101)                     | 41 | 51–74 |
|                     | All                 | 3441 | 78 ± 17    | 78 (17–154)                     | 51 | 68–89 | 1212                                                                                  | 81 ± 15   | 80 (35–154)                     | 57 | 71–90 | 2229                                                                               | 77 ± 17   | 77 (17–135)                     | 49 | 67–88 |
| Women               | 65–69               | 1377 | 77 ± 14    | 76 (30–168)                     | 57 | 68–85 | 818                                                                                   | 76 ± 13   | 75 (30–168)                     | 57 | 68–84 | 559                                                                                | 77 ± 15   | 76 (31–132)                     | 55 | 67–87 |
|                     | 70–74               | 1638 | 76 ± 14    | 75 (25–176)                     | 53 | 67–84 | 832                                                                                   | 76 ± 14   | 75 (30–125)                     | 54 | 67–83 | 806                                                                                | 76 ± 15   | 76 (25–176)                     | 52 | 67–84 |
|                     | 75–79               | 1450 | 73 ± 14    | 72 (26–133)                     | 51 | 64–82 | 633                                                                                   | 74 ± 14   | 73 (30–123)                     | 53 | 64–82 | 817                                                                                | 73 ± 15   | 72 (26–133)                     | 49 | 63–82 |
|                     | 80–84               | 545  | 70 ± 16    | 68 (18–122)                     | 44 | 59–79 | 197                                                                                   | 71 ± 15   | 71 (28–117)                     | 51 | 62–81 | 348                                                                                | 68 ± 16   | 67 (18–122)                     | 43 | 58–78 |
|                     | 85–89               | 204  | 67 ± 17    | 67 (27–121)                     | 40 | 56–79 | 63                                                                                    | 71 ± 17   | 69 (37–121)                     | 44 | 57–83 | 141                                                                                | 66 ± 16   | 66 (27–106)                     | 38 | 55–76 |
|                     | ≥90                 | 50   | 66 ± 17    | 68 (26–97)                      | 39 | 51–78 | 13                                                                                    | 71 ± 16   | 72 (44–97)                      | 44 | 66–78 | 37                                                                                 | 64 ± 18   | 64 (26–95)                      | 39 | 50–76 |
|                     | All                 | 5264 | 74 ± 15    | 74 (18–176)                     | 51 | 65–83 | 2556                                                                                  | 75 ± 14   | 74 (28–168)                     | 53 | 66–83 | 2708                                                                               | 74 ± 16   | 73 (18–176)                     | 48 | 64–83 |
| <b>CKD-EPI eGFR</b> |                     |      |            |                                 |    |       |                                                                                       |           |                                 |    |       |                                                                                    |           |                                 |    |       |
| All                 | 65–69               | 2277 | 80 ± 12    | 82 (16–109)                     | 60 | 73–90 | 1217                                                                                  | 81 ± 11   | 82 (31–109)                     | 61 | 73–90 | 1060                                                                               | 80 ± 12   | 82 (16–101)                     | 59 | 73–90 |
|                     | 70–74               | 2808 | 77 ± 12    | 80 (25–106)                     | 54 | 70–87 | 1248                                                                                  | 78 ± 11   | 80 (30–106)                     | 57 | 71–87 | 1560                                                                               | 77 ± 13   | 80 (25–106)                     | 52 | 70–87 |
|                     | 75–79               | 2307 | 73 ± 12    | 74 (19–99)                      | 50 | 65–84 | 902                                                                                   | 74 ± 11   | 75 (30–97)                      | 53 | 66–84 | 1405                                                                               | 72 ± 13   | 74 (19–99)                      | 48 | 64–84 |
|                     | 80–84               | 884  | 69 ± 14    | 70 (16–93)                      | 44 | 60–81 | 287                                                                                   | 71 ± 13   | 73 (27–92)                      | 49 | 62–81 | 597                                                                                | 67 ± 14   | 69 (16–93)                      | 41 | 58–80 |
|                     | 85–89               | 356  | 64 ± 14    | 66 (16–89)                      | 38 | 55–77 | 97                                                                                    | 67 ± 13   | 68 (35–89)                      | 44 | 58–79 | 259                                                                                | 63 ± 15   | 64 (16–88)                      | 35 | 53–76 |
|                     | ≥90                 | 73   | 60 ± 14    | 62 (24–80)                      | 37 | 49–73 | 17                                                                                    | 64 ± 11   | 65 (41–78)                      | 41 | 56–75 | 56                                                                                 | 59 ± 15   | 59 (24–80)                      | 36 | 47–73 |
|                     | All                 | 8705 | 75 ± 13    | 78 (16–109)                     | 51 | 67–86 | 3768                                                                                  | 77 ± 12   | 79 (27–109)                     | 55 | 69–86 | 4937                                                                               | 74 ± 14   | 77 (16–106)                     | 47 | 66–85 |
| Men                 | 65–69               | 900  | 82 ± 11    | 85 (16–106)                     | 61 | 75–90 | 399                                                                                   | 83 ± 11   | 86 (45–106)                     | 63 | 76–91 | 501                                                                                | 81 ± 12   | 84 (16–101)                     | 60 | 75–90 |
|                     | 70–74               | 1170 | 78 ± 12    | 82 (27–106)                     | 53 | 71–87 | 416                                                                                   | 80 ± 11   | 83 (45–106)                     | 61 | 72–87 | 754                                                                                | 77 ± 13   | 81 (27–100)                     | 51 | 70–87 |
|                     | 75–79               | 857  | 73 ± 13    | 75 (19–99)                      | 49 | 64–84 | 269                                                                                   | 74 ± 12   | 76 (35–97)                      | 54 | 67–84 | 588                                                                                | 72 ± 14   | 74 (19–99)                      | 47 | 63–84 |
|                     | 80–84               | 339  | 70 ± 14    | 73 (18–93)                      | 44 | 60–82 | 90                                                                                    | 73 ± 12   | 76 (33–92)                      | 48 | 66–83 | 249                                                                                | 69 ± 15   | 71 (18–93)                      | 41 | 58–81 |
|                     | 85–89               | 152  | 65 ± 14    | 66 (16–88)                      | 38 | 56–77 | 34                                                                                    | 68 ± 11   | 68 (45–87)                      | 47 | 59–78 | 118                                                                                | 64 ± 15   | 65 (16–88)                      | 32 | 54–77 |
|                     | ≥90                 | 23   | 58 ± 12    | 59 (36–80)                      | 39 | 47–69 | 4                                                                                     | 60 ± 5    | 60 (55–65)                      | 55 | 55–64 | 19                                                                                 | 58 ± 14   | 59 (36–80)                      | 36 | 47–70 |
|                     | All                 | 3441 | 76 ± 14    | 79 (16–106)                     | 50 | 68–87 | 1212                                                                                  | 79 ± 12   | 81 (33–106)                     | 56 | 71–87 | 2229                                                                               | 75 ± 14   | 78 (16–101)                     | 47 | 67–86 |

Continued

Table 2. Continued

| Age   | All 3C participants |            |                          |    |       | Participants without CKD risk factors <sup>b</sup> or self-reported kidney disease |           |                          |    |       | Participants with CKD risk factors <sup>b</sup> or self-reported kidney disease |           |                          |    |       |
|-------|---------------------|------------|--------------------------|----|-------|------------------------------------------------------------------------------------|-----------|--------------------------|----|-------|---------------------------------------------------------------------------------|-----------|--------------------------|----|-------|
|       | N                   | Mean ± Std | Median (minimum–maximum) | P5 | Q1–Q3 | N                                                                                  | Mean ± SD | Median (minimum–maximum) | P5 | Q1–Q3 | N                                                                               | Mean ± SD | Median (minimum–maximum) | P5 | Q1–Q3 |
| Women |                     |            |                          |    |       |                                                                                    |           |                          |    |       |                                                                                 |           |                          |    |       |
| 65–69 | 1377                | 80 ± 11    | 81 (31–109)              | 59 | 72–90 | 818                                                                                | 79 ± 11   | 81 (31–109)              | 60 | 72–89 | 559                                                                             | 80 ± 12   | 81 (32–101)              | 58 | 71–90 |
| 70–74 | 1638                | 77 ± 12    | 79 (25–106)              | 55 | 70–87 | 832                                                                                | 77 ± 11   | 79 (30–98)               | 56 | 70–87 | 806                                                                             | 77 ± 12   | 79 (25–106)              | 54 | 70–87 |
| 75–79 | 1450                | 73 ± 12    | 74 (25–97)               | 51 | 65–83 | 633                                                                                | 73 ± 11   | 75 (30–94)               | 53 | 65–83 | 817                                                                             | 73 ± 13   | 74 (25–97)               | 49 | 64–84 |
| 80–84 | 545                 | 68 ± 14    | 68 (16–92)               | 44 | 59–79 | 197                                                                                | 70 ± 13   | 72 (27–91)               | 50 | 61–81 | 348                                                                             | 67 ± 14   | 67 (16–92)               | 43 | 58–79 |
| 85–89 | 204                 | 64 ± 14    | 65 (25–89)               | 38 | 55–77 | 63                                                                                 | 67 ± 14   | 68 (35–89)               | 43 | 55–79 | 141                                                                             | 63 ± 14   | 64 (25–84)               | 35 | 53–75 |
| ≥90   | 50                  | 61 ± 15    | 65 (24–80)               | 37 | 49–75 | 13                                                                                 | 65 ± 12   | 69 (41–78)               | 41 | 62–75 | 37                                                                              | 60 ± 16   | 61 (24–80)               | 36 | 47–74 |
| All   | 5264                | 75 ± 13    | 77 (16–109)              | 51 | 67–85 | 2556                                                                               | 76 ± 12   | 77 (27–109)              | 54 | 68–86 | 2708                                                                            | 74 ± 14   | 76 (16–106)              | 48 | 65–85 |

<sup>a</sup>eGFR, glomerular filtration rate estimated with the MDRD, Modification of Diet in Renal Disease study and the CKD-EPI, Chronic Kidney Disease–Epidemiology Collaboration equations; P5, Q1–Q3, are the 5th percentile and interquartile range of the eGFR distribution.

<sup>b</sup>Obesity, BP ≥ 160/100, diabetes and cardiovascular history.

Table 3. Number of participants (%) reclassified into upper or lower eGFR categories using CKD-EPI versus MDRD study equation<sup>a</sup>

|       | MDRD eGFR (mL/min/1.73m <sup>2</sup> ) | CKD-EPI eGFR (mL/min/1.73m <sup>2</sup> ) |           |              |           |      | Total |
|-------|----------------------------------------|-------------------------------------------|-----------|--------------|-----------|------|-------|
|       |                                        | <30                                       | 30–44     | 45–59        | 60–89     | >90  |       |
| <30   | 25 (0.3)                               | 0                                         | 0         | 0            | 0         | 0    | 25    |
| 30–44 | 5 (0.1)                                | 171 (2.0)                                 | 6 (0.1)   | 0            | 0         | 0    | 182   |
| 45–59 | 0                                      | 18 (0.2)                                  | 849 (9.8) | 117 (1.3)    | 0         | 0    | 984   |
| 60–89 | 0                                      | 0                                         | 49 (0.6)  | 5,914 (67.9) | 93 (1.1)  | 0    | 6056  |
| >90   | 0                                      | 0                                         | 0         | 663 (7.6)    | 795 (9.1) | 0    | 1458  |
| Total | 30                                     | 189                                       | 904       | 6694         | 888       | 8705 |       |

<sup>a</sup>In the upper diagonal, eGFR CKD-EPI underestimates eGFR compared to MDRD study equation, whereas it overestimates into the lower diagonal. eGFR, estimated glomerular filtration rate with the CKD-EPI, Chronic Kidney Disease Epidemiology Collaboration and the MDRD, Modification of Diet in Renal Disease study equations.

## Results

### Baseline characteristics

More than 80% of the participants had at least one CKD risk factor, but fewer than 1% reported kidney disease (Table 1). They were older, more often men and had lower eGFR with either equation than their counterparts without CKD risk factors or kidney disease (all P-values < 0.0001). Baseline eGFRs and BMI were higher in participants with than without the 4-year follow-up (P < 0.001); they were also more often women and had less Stage 2 hypertension (P < 0.05), but other characteristics were similar.

### Age- and sex-specific serum creatinine and eGFR values

MDRD eGFRs ranged from 17 to 176 mL/min/1.73m<sup>2</sup> and CKD-EPI eGFRs from 16 to 109 mL/min/1.73m<sup>2</sup>, for serum creatinine values from 32 to 322 μmol/L (Table 2 and Supplementary Table 1). Gradient for age was steeper with the CKD-EPI than the MDRD equation. Mean eGFR was higher in men than in women using either equation, but differences between sexes were attenuated with the CKD-EPI equation. All eGFR values were lower in participants with than without CKD risk factors. The CKD-EPI equation reclassified 117 participants (9.8%) with MDRD eGFR < 60 mL/min/1.73m<sup>2</sup> upward to an eGFR ≥ 60 and 49 (< 1%) with MDRD eGFR ≥ 60 downward to an eGFR < 60; 49.3% of those with MDRD eGFR ≥ 90 were reclassified downward (Table 3).

### HRs for 6-year mortality related to baseline eGFR

After adjustment for several confounders, only those with an eGFR < 45 mL/min/1.73m<sup>2</sup> had significantly higher all-cause mortality than those with an eGFR of 75 to 89 mL/min/1.73m<sup>2</sup>, in both men and women and with either equation (Table 4). Cardiovascular mortality significantly exceeded that of the reference group for eGFRs < 60 mL/min/1.73m<sup>2</sup> in the overall population, but for each sex taken separately, it significantly exceeded only for eGFR < 45 mL/min/1.73m<sup>2</sup>.

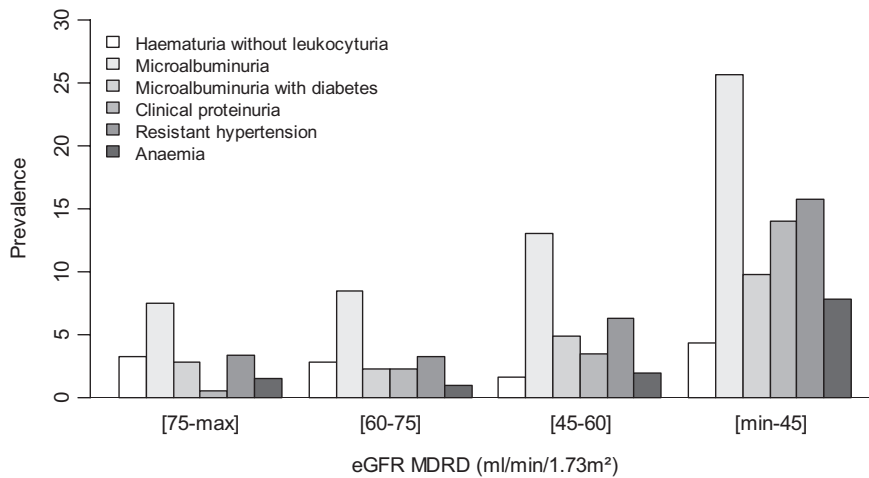

**Fig. 2.** Prevalence of kidney damage markers according to eGFR level in the subsample microalbuminuria defined as an albumin:creatinine ratio  $\geq 3$  (30) and  $< 30$  (300) mg/mmol (mg/g) and clinical proteinuria as a protein:creatinine ratio  $\geq 50$  mg/mmol ( $\geq 500$  mg/g). Resistant hypertension defined as a BP  $\geq 130/80$  mmHg for those with an eGFR  $< 60$  mL/min/1.73m<sup>2</sup>, diabetes, proteinuria  $\geq 50$  mg/mmol or albuminuria  $\geq 30$  mg/mmol, otherwise the threshold was 140/90 mmHg. Anaemia was defined as an haemoglobin  $< 11$  g/dL

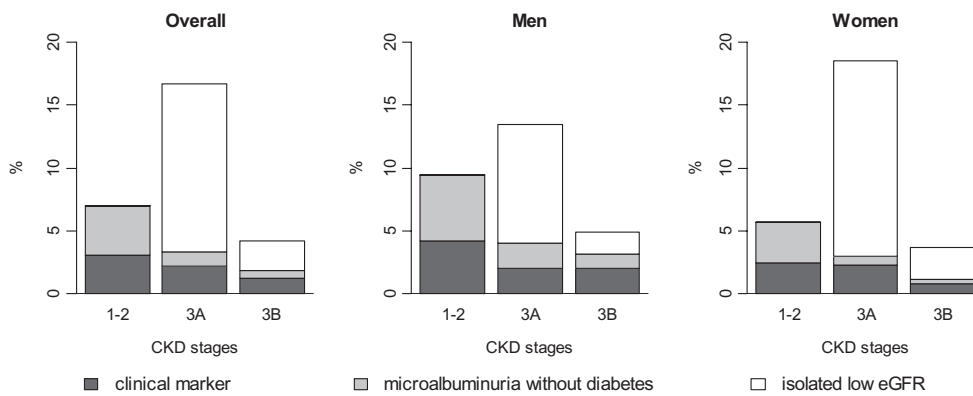

**Fig. 3.** Prevalence of CKD stages and distribution of isolated low eGFR, microalbuminuria without diabetes and at least one clinically relevant marker by CKD stage and sex microalbuminuria defined as an albumin:creatinine ratio  $\geq 3$  (30) and  $< 30$  (300) mg/mmol (mg/g); clinically relevant markers include microalbuminuria with diabetes, clinical proteinuria defined as a protein:creatinine ratio  $\geq 50$  mg/mmol ( $\geq 500$  mg/g), anaemia defined as an haemoglobin  $< 11$  g/dL and resistant hypertension defined as a BP  $\geq 130/80$  mmHg for those with an eGFR  $< 60$  mL/min/1.73m<sup>2</sup>, diabetes, proteinuria  $\geq 50$  mg/mmol or albuminuria  $\geq 30$  mg/mmol, otherwise the threshold was 140/90 mmHg.

*eGFR decline according to participant baseline characteristics and mean eGFR*

In the 1298 participants with a 4-year follow-up, the MDRD eGFR decreased in nearly 4 of 10 by  $> 2$  mL/min/1.73m<sup>2</sup>/year, 1 of 6 by  $> 4$  and in 10% by  $> 5$  mL/min/1.73m<sup>2</sup>/year (Table 5). The adjusted mean annual decline was significantly steeper in men than in women and in those with than without diabetes at baseline but was not related to age and individual mean MDRD eGFR. There was a nonsignificant trend toward steeper decline with increasing BP in those with hypertension. Mean CKD-EPI eGFR decline was  $1.53 \pm 2.35$  mL/min/1.73m<sup>2</sup>/year and was similarly related with studied factors (data not shown).

*Prevalence of kidney damage markers according to mean MDRD eGFR level*

In the subsample, as MDRD eGFR decreased from  $\geq 75$  to  $< 45$  mL/min/1.73m<sup>2</sup>, the prevalence of microalbuminuria increased from 7.4 to 25.6%, that of microalbuminuria associ-

ated with diabetes from 2.8 to 9.8%, clinical proteinuria from 0.6 to 14.0%, resistant hypertension from 3.3 to 15.7% and of anaemia from 1.5 to 7.5% (Figure 2). Haematuria without leukocyturia did not increase with decreasing MDRD eGFR.

*Prevalence of CKD stages and percentage of kidney damage markers by stage*

In the subsample, the prevalence of CKD using MDRD eGFR was 27.9%; it was 7.0% for Stages 1–2, 16.7% for 3A and 4.2% for 3B or higher (Figure 3). More men than women had CKD Stages 1–2, but more women than men had Stage 3. Nearly half of both men and women at Stages 1–2 had at least one clinically relevant marker and the other half microalbuminuria alone. In men and women with Stage 3A, 30 and 16% had markers of kidney damage, and with Stage 3B or higher, 64 and 31%, respectively. The prevalence of CKD Stages 1–2 was three times higher in those with than without diabetes, 15.7 versus 5.7%; it was closer for other stages: 15.1 versus 16.9% for Stage 3A and 5.7 versus 3.9% for Stage 3B or higher. Using CKD-EPI, the overall



**Table 4.** Adjusted HRs for 6-year all-cause and cardiovascular mortality related to baseline eGFR using either the MDRD or CKD-EPI equation, overall and by sex<sup>a</sup>

|                          | eGFR in ml/min/1.73m <sup>2</sup> |         |               |               |                |                |
|--------------------------|-----------------------------------|---------|---------------|---------------|----------------|----------------|
|                          | ≥90                               | 75–89   | 60–74         | 45–59         | 30–44          | <30            |
| All participants         |                                   |         |               |               |                |                |
| MDRD                     | 1458                              | 3018    | 3032          | 982           | 182            | 25             |
| CKD-EPI                  | 888                               | 4075    | 2612          | 903           | 189            | 30             |
| All-cause mortality      |                                   |         |               |               |                |                |
| MDRD                     | 1.1 (0.9–1.4)                     | 1 (ref) | 1.0 (0.8–1.2) | 1.1 (0.9–1.4) | 2.2 (1.6–3.0)  | 3.4 (2.0–5.9)  |
| CKD-EPI                  | 1.2 (0.9–1.6)                     | 1 (ref) | 0.9 (0.8–1.1) | 1.1 (0.9–1.3) | 2.0 (1.5–2.7)  | 3.3 (2.0–5.5)  |
| Cardiovascular mortality |                                   |         |               |               |                |                |
| MDRD                     | 1.4 (0.9–2.1)                     | 1 (ref) | 1.0 (0.7–1.4) | 1.7 (1.1–2.5) | 3.7 (2.2–6.2)  | 3.5 (1.2–10.0) |
| CKD-EPI                  | 1.5 (0.9–2.6)                     | 1 (ref) | 0.9 (0.6–1.3) | 1.6 (1.1–2.3) | 3.1 (1.8–5.0)  | 4.3 (1.8–10.2) |
| No of men                |                                   |         |               |               |                |                |
| MDRD                     | 773                               | 1240    | 1008          | 337           | 64             | 14             |
| CKD-EPI                  | 417                               | 1664    | 918           | 350           | 70             | 17             |
| All-cause mortality      |                                   |         |               |               |                |                |
| MDRD                     | 1.1 (0.9–1.5)                     | 1 (ref) | 1.0 (0.8–1.3) | 1.1 (0.8–1.5) | 2.5 (1.6–3.8)  | 2.5 (1.2–5.5)  |
| CKD-EPI                  | 1.3 (0.9–1.8)                     | 1 (ref) | 0.9 (0.7–1.1) | 1.1 (0.8–1.4) | 2.0 (1.3–3.1)  | 2.9 (1.5–5.5)  |
| Cardiovascular mortality |                                   |         |               |               |                |                |
| MDRD                     | 1.5 (0.9–2.4)                     | 1 (ref) | 1.2 (0.7–1.9) | 1.6 (0.9–2.7) | 5.2 (2.6–10.3) | 1.3 (0.2–10.0) |
| CKD-EPI                  | 1.5 (0.8–2.7)                     | 1 (ref) | 0.9 (0.6–1.4) | 1.4 (0.9–2.3) | 3.4 (1.7–6.8)  | 3.1 (0.9–10.2) |
| No of women              |                                   |         |               |               |                |                |
| MDRD                     | 685                               | 1778    | 2024          | 645           | 118            | 11             |
| CKD-EPI                  | 471                               | 2411    | 1694          | 553           | 119            | 13             |
| All-cause mortality      |                                   |         |               |               |                |                |
| MDRD                     | 1.2 (0.8–1.7)                     | 1 (ref) | 1.0 (0.8–1.3) | 1.2 (0.9–1.7) | 2.1 (1.3–3.2)  | 6.8 (3.1–15.0) |
| CKD-EPI                  | 0.9 (0.5–1.5)                     | 1 (ref) | 1.0 (0.8–1.3) | 1.1 (0.8–1.5) | 2.0 (1.3–3.0)  | 4.9 (2.2–10.8) |
| Cardiovascular mortality |                                   |         |               |               |                |                |
| MDRD                     | 1.1 (0.5–2.3)                     | 1 (ref) | 0.7 (0.4–1.3) | 1.7 (0.9–3.0) | 2.5 (1.1–5.5)  | 8.6 (2.4–31.0) |
| CKD-EPI                  | 1.3 (0.5–3.9)                     | 1 (ref) | 0.8 (0.5–1.4) | 1.8 (1.0–3.1) | 2.8 (1.3–5.8)  | 7.4 (2.1–26.6) |

<sup>a</sup>Adjusted for age, sex, city, annual income, smoking, history of cardiovascular disease, BMI, hypertension, diabetes, hypercholesterolaemia and use of renin–angiotensin system inhibitors. eGFR, glomerular filtration rate estimated with both the Modification of Diet in Renal Disease (MDRD) study and the Chronic Kidney Disease-Epidemiology Collaboration (CKD-EPI) equations.

prevalence was also 27.9%; it was 7.2% for Stages 1–2, 15.4% for 3A and 5.3% for 3B or higher.

## Discussion

Knowledge of the specific aspects of CKD epidemiology in the elderly is essential to implement appropriate management. The determination of eGFR distribution for old and very old people, based on IDMS traceable serum creatinine and appropriate equations, is thus an important step forward. This study showed that impaired kidney function was associated with excess mortality with very similar risk estimates using the MDRD or the CKD-EPI equations. Moreover, more than one of six individuals in this population had fast eGFR decline rate, >4 mL/min/1.73m<sup>2</sup>. The most original findings indicate that only a fraction of those with decreased eGFR have markers of kidney damage and that others than proteinuria should be considered to assess its clinical significance in the elderly.

The large sample size of this population and the low number of participants lost to follow-up (8 of 8705 at 6 years) are major strengths of this study. Other strengths include the use of standardized measures of creatinine over 4 years, which reduced systematic bias in the estimate of

eGFR decline. This study also has limitations. First, the participation rate was low, and those who participated differed somewhat in age and sex distribution as compared with the general population aged 65 years and over in the three towns [43]. Moreover, the recruitment procedure led to the selection of urban participants only, who also had a higher socioeconomic levels than the overall French population. Although this might have led to underestimation of CKD prevalence, it should not have biased the relations between eGFR level and the studied markers and outcomes. Second, data on ethnicity were not available to calculate eGFR. Because elderly people selected from these cities' electoral rolls are unlikely to be of African origin, this factor should have minimal impact on eGFR estimates, but our reference values are only generalizable to European elderly. Third, baseline data on ACR/PCR would have been valuable to assess the independent impact on decline and mortality and to assess risk stratification using eGFR and ACR. Fourth, 26% of Bordeaux participants alive at 4 years declined the follow-up study. They differ slightly from those included with respect to age and sex but were highly comparable for the other baseline data including eGFR. This may have decreased study power, particularly in the subgroup analyses, but is unlikely to have systematically biased our estimates of eGFR decline. In contrast,

**Table 5.** eGFR decline using the MDRD study equation according to baseline characteristics and participant mean eGFR in the subsample with 4-year follow-up

|                                                    | N    | Crude eGFR decline (mL/min/<br>1.73m <sup>2</sup> /year) |             | Adjusted eGFR decline <sup>a</sup> (mL/min/<br>1.73m <sup>2</sup> /year) |        |
|----------------------------------------------------|------|----------------------------------------------------------|-------------|--------------------------------------------------------------------------|--------|
|                                                    |      | % >4                                                     | Mean ± SD   | Mean (95% CI)                                                            | P      |
| All                                                | 1298 | 17.4                                                     | 1.46 ± 2.87 | 1.46 (1.30–1.61)                                                         |        |
| Age (years)                                        |      |                                                          |             |                                                                          |        |
| 65–70                                              | 303  | 14.5                                                     | 1.16 ± 2.60 | 1.15 (0.83–1.48)                                                         | 0.19   |
| 70–75                                              | 458  | 17.9                                                     | 1.55 ± 2.87 | 1.56 (1.30–1.82)                                                         |        |
| 75–80                                              | 354  | 19.2                                                     | 1.61 ± 2.99 | 1.59 (1.29–1.89)                                                         |        |
| ≥80                                                | 183  | 17.5                                                     | 1.40 ± 3.06 | 1.42 (1.00–1.84)                                                         |        |
| Men                                                | 474  | 20.7                                                     | 1.83 ± 2.89 | 1.78 (1.52–2.04)                                                         | 0.0025 |
| Women                                              | 824  | 15.5                                                     | 1.24 ± 2.84 | 1.27 (1.07–1.47)                                                         |        |
| Diabetes <sup>b</sup>                              |      |                                                          |             |                                                                          |        |
| No                                                 | 1151 | 15.7                                                     | 1.33 ± 2.81 | 1.34 (1.17–1.50)                                                         | 0.0002 |
| Yes                                                | 123  | 34.1                                                     | 2.56 ± 3.23 | 2.45 (1.95–2.96)                                                         |        |
| Unknown                                            | 24   | 12.5                                                     | 1.86 ± 2.91 | 1.91 (0.77–3.05)                                                         |        |
| Hypertension and BP in mmHg                        |      |                                                          |             |                                                                          |        |
| No                                                 | 288  | 12.8                                                     | 1.23 ± 2.54 | 1.34 (1.00–1.67)                                                         | 0.35   |
| Yes, treated                                       |      |                                                          |             |                                                                          |        |
| BP < 140/90                                        | 270  | 19.3                                                     | 1.40 ± 3.03 | 1.37 (1.03–1.71)                                                         |        |
| 140/90 ≤ BP < 160/95                               | 400  | 15.0                                                     | 1.39 ± 2.85 | 1.39 (1.11–1.67)                                                         |        |
| BP ≥ 160/95                                        | 340  | 22.6                                                     | 1.78 ± 3.02 | 1.70 (1.39–2.00)                                                         |        |
| Participant mean eGFR in mL/min/1.73m <sup>2</sup> |      |                                                          |             |                                                                          |        |
| ≥75                                                | 670  | 19.0                                                     | 1.44 ± 2.99 | 1.41 (1.20–1.63)                                                         | 0.68   |
| 60–75                                              | 430  | 15.3                                                     | 1.39 ± 2.71 | 1.44 (1.17–1.71)                                                         |        |
| 45–60                                              | 169  | 16.0                                                     | 1.68 ± 2.76 | 1.70 (1.27–2.13)                                                         |        |
| <45                                                | 29   | 20.7                                                     | 1.45 ± 3.26 | 1.26 (0.21–2.31)                                                         |        |

<sup>a</sup>Adjusted for age, sex, diabetes, hypertension and participant mean eGFR over 4 years.

<sup>b</sup>Diabetes was self-reported or defined as fasting glycaemia ≥7 mmol/L or nonfasting glycaemia ≥11 mmol/L or antidiabetic drug use.

the 137 participants who died within 4 years are likely to be those with more rapid decline [29], and this may have underestimated the observed rate. Finally, eGFR decline rate was assessed based on only two creatinine measurements which may have reduced the accuracy of estimates, but other sources of inaccuracy were well controlled: creatinine measurements were standardized over the study period, and adjustment for individual mean eGFR should have reduced regression to the mean [48, 49].

It is well established that kidney function decreases with age, but the magnitude of normal decline, measured by a reference method, is unknown in the oldest groups. Our age- and sex-specific mean MDRD eGFR values in participants without CKD risk factors were 7–12 mL/min/1.73m<sup>2</sup> higher than those provided in 869 Dutch subjects aged 65 years or older, free from kidney or cardiovascular disease, hypertension and diabetes [18]. This is likely to be due to the use of non-IDMS traceable creatinine and early MDRD equation in the Dutch study [18], which underestimates true GFR at higher levels [40]. Another likely explanation may be a healthier profile in the 3C population. As expected, eGFR values with either equation were lower in those with than without CKD risk factors, and differences tended to widen with age and in men compared with women. In contrast with what was observed in the middle-aged population of the Atherosclerosis Risk in Communities (ARIC) study, the CKD-EPI equation reclassified upward <10% of the 3C participants with MDRD eGFR <60 mL/min/1.73 m<sup>2</sup> versus about 45% in ARIC participants [42], resulting in little impact on the prevalence of

CKD Stage 3 or higher, 12.9 versus 13.7%. On the opposite side, while only those with MDRD eGFR >120 mL/min/1.73m<sup>2</sup> were reclassified downward with the CKD-EPI equation in the ARIC study, this was observed in nearly 50% of the 3C participants with MDRD eGFR >90, resulting in lesser discrimination in the upper range of eGFR values. As previously noticed from the properties of the CKD-EPI equation compared with the MDRD equation, the gradient with age was steeper, and differences between men and women at each age were smaller [40].

Few population-based studies have investigated eGFR changes over time [27–29]. Our annual rates of eGFR decline, i.e. 1.46 mL/min/1.73m<sup>2</sup>/year with the MDRD equation and 1.53 with CKD-EPI, was similar to that observed in The Longitudinal Aging Study [27], i.e. 1.49 mL/min/year based on creatinine clearance in the 70- to 79-year olds, but was greater than in the Cardiovascular Health Study (CHS) elderly population, 0.4 mL/min/1.73m<sup>2</sup>/year [29]. Differences in creatinine assays and eGFR equations between studies probably explain this discrepancy. As in another community-dwelling elderly cohort [28], eGFR declined faster in men than in women, in those with than without diabetes, but no trend appeared as individual mean eGFR decreased. Although there was a trend toward steeper decline in those with poorer BP control, the association was nonsignificant in this population. The K/DOQI [3] defines decline rates >4 mL/min/1.73m<sup>2</sup>/year as ‘fast’, as individuals with eGFR <60 mL/min/1.73m<sup>2</sup> might reach end-stage kidney disease within 10 years. This was found in 17% of the 3C participants. In contrast, the UK NICE



defines progression as a decline  $>5$  mL/min/1.73m<sup>2</sup> within 1 year or  $>10$  mL/min/1.73m<sup>2</sup> within 5 years [22]. More than a third of 3C participants had an annual decline  $>2$  mL/min/1.73m<sup>2</sup>, i.e. 10 in 5 years, but 9.9%  $>5$  mL/min/1.73m<sup>2</sup>, which is slightly higher than the 6.8% observed in the UK East Kent population aged 70–80 years old [50]. Although it is well known that mortality risk outweighs that of end-stage kidney disease [35, 36, 51], this percentage may more closely assess the fraction of the elderly population with significant CKD progression to be targeted for nephrological assessment and management.

Several studies have shown that the mortality risk associated with a given eGFR level is attenuated in the elderly [14, 34, 38, 39, 52]. In younger individuals, mortality risk exceeds that of their reference category at an eGFR of 60 mL/min/1.73m<sup>2</sup>, but in those older than 75 years, the relevant eGFR would be closer to 45 mL/min/1.73m<sup>2</sup> [38]. Our results are consistent with these studies when using the MDRD equation to estimate GFR. Using the CKD-EPI equation provided very similar HR estimates, but in women, that for cardiovascular mortality in those with an eGFR of 45–60 mL/min/1.73m<sup>2</sup> was of borderline significance.

This study assessed the severity of kidney damage, based on current recommended criteria for specialist referral and available evidence that treatment can improve patient outcomes [3, 22–24]. As previously observed [5], microalbuminuria was common but was associated with diabetes in only one-third of cases. Although microalbuminuria is a well-established risk factor of both end-stage kidney disease and death [37, 39, 53, 54], only in this latter case is it targeted by therapeutic guidelines [3, 22, 55, 56]. In contrast, clinical proteinuria, a modifiable risk factor for CKD progression [22], was uncommon above an eGFR of 45 mL/min/1.73m<sup>2</sup>, which is consistent with findings for older adults in the USA [56]. Another sign of disease severity requiring specialist referral is resistant hypertension, defined by the 2004 K/DOQI as poor BP control despite the use of at least three antihypertensive drugs [23, 57]. Whereas several studies have shown that a high prevalence of uncontrolled BP among those with CKD [58–60] that of resistant hypertension has not been specifically assessed. Here, it affected 6% of those at CKD Stage 3A and 16% at Stage 3B or higher. K/DOQI defined anaemia [24] is also an early and severe CKD complication [25, 26]. Though less common than resistant hypertension, anaemia may help identify elderly people with true but poorly proteinuric CKD. Finally, disproportionately high rates of CKD Stage 3 as compared with Stages 1–2 were often observed in the elderly, e.g. 38 versus 10% in NHANES, an odd finding, which nourished the controversies about its clinical significance [56]. Although such disproportion was not seen in the 3C study with either equation, it is clear that kidney markers together with eGFR level provided a more relevant distribution for disease severity stages than previously observed in the older population.

In conclusion, we have shown that the CKD-EPI equation may not improve categorization of elderly people with respect to CKD and long-term mortality risk compared with the MDRD equation. Only a fraction of those with impaired function, higher in men than in women,

have markers of kidney damage and who might deserve specialist assessment and appropriate care. In the elderly, the focus of referral could be on eGFR  $<45$  mL/min/1.73m<sup>2</sup> with anaemia, resistant hypertension or clinical proteinuria, in addition to microalbuminuria in the presence of diabetes.

## Supplementary data

Supplementary data are available online at <http://ndt.oxfordjournals.org>.

**Acknowledgements.** We thank Jo Ann Cahn for the English revision of this manuscript.

**Funding.** The 3C study is conducted under a partnership agreement between the Institut National de la Santé et de la Recherche Médicale (Inserm), the Victor Segalen-Bordeaux 2 University, and Sanofi-Aventis. The Fondation pour la Recherche Médicale funded the preparation and initiation of the study. The 3C study was also supported by the Caisse Nationale d'Assurance Maladie des Travailleurs Salariés, Direction Générale de la Santé, Mutuelle Générale de l'Éducation Nationale, Institut de la Longévité, Conseils Régionaux d'Aquitaine et Bourgogne, Fondation de France, and Ministry of Research-INSERM Program "Cohortes et collections de données biologiques". The CKD substudy was supported by grants from the Société de Néphrologie, Inserm program « Réseaux de recherche » (A08058LS) and GIS-IRESP Research program "Très grandes infrastructures de recherche" (AO 08113LS).

**Conflict of interest statement.** None declared.

(See related article by Roderick. Chronic kidney disease in older people: a cause for concern? *Nephrol Dial Transplant* 2011; 26: 3083–3085.)

## References

1. Levey AS, Atkins R, Coresh J *et al.* Chronic kidney disease as a global public health problem: approaches and initiatives—a position statement from Kidney Disease Improving Global Outcomes. *Kidney Int* 2007; 72: 247–259
2. Stenvinkel P. Chronic kidney disease: a public health priority and harbinger of premature cardiovascular disease. *J Intern Med* 2010; 268: 456–467
3. K/DOQI clinical practice guidelines for chronic kidney disease: evaluation, classification, and stratification. *Am J Kidney Dis* 2002; 39: S1–S266
4. Hallan SI, Dahl K, Oien CM *et al.* Screening strategies for chronic kidney disease in the general population: follow-up of cross sectional health survey. *BMJ* 2006; 333: 1047
5. Coresh J, Selvin E, Stevens LA *et al.* Prevalence of chronic kidney disease in the United States. *JAMA* 2007; 298: 2038–2047
6. Campbell KH, O'Hare AM. Kidney disease in the elderly: update on recent literature. *Curr Opin Nephrol Hypertens* 2008; 17: 298–303
7. Zhang QL, Rothenbacher D. Prevalence of chronic kidney disease in population-based studies: systematic review. *BMC Public Health* 2008; 8: 117
8. Hemmelgarn BR, Zhang J, Manns BJ *et al.* Nephrology visits and health care resource use before and after reporting estimated glomerular filtration rate. *JAMA* 2010; 303: 1151–1158
9. Kagoma YK, Weir MA, Iansavichus AV *et al.* Impact of estimated GFR reporting on patients, clinicians, and health-care systems: a systematic review. *Am J Kidney Dis* 2011; 57: 592–601
10. Clase CM, Garg AX, Kiberd BA. Classifying kidney problems: can we avoid framing risks as diseases? *BMJ* 2004; 329: 912–915
11. Glascock RJ, Winearls C. Screening for CKD with eGFR: doubts and dangers. *Clin J Am Soc Nephrol* 2008; 3: 1563–1568
12. Coresh J, Stevens LA, Levey AS. Chronic kidney disease is common: what do we do next? *Nephrol Dial Transplant* 2008; 23: 1122–1125

13. Stevens LA, Coresh J, Levey AS. CKD in the elderly—old questions and new challenges: World Kidney Day 2008. *Am J Kidney Dis* 2008; 51: 353–357
14. O'Hare AM. The management of older adults with a low eGFR: moving toward an individualized approach. *Am J Kidney Dis* 2009; 53: 925–927
15. Poggio ED, Rule AD. A critical evaluation of chronic kidney disease—should isolated reduced estimated glomerular filtration rate be considered a 'disease'? *Nephrol Dial Transplant* 2009; 24: 698–700
16. Glasscock RJ. Referrals for chronic kidney disease: real problem or nuisance? *JAMA* 2010; 303: 1201–1203
17. Mangione F, Dal Canton A. The epidemic of chronic kidney disease: looking at ageing and cardiovascular disease through kidney-shaped lenses. *J Intern Med* 2010; 268: 449–455
18. Wetzels JF, Kiemeneys LA, Swinkels DW *et al*. Age- and gender-specific reference values of estimated GFR in Caucasians: the Nijmegen Biomedical Study. *Kidney Int* 2007; 72: 632–637
19. Esposito C, Plati A, Mazzullo T *et al*. Renal function and functional reserve in healthy elderly individuals. *J Nephrol* 2007; 20: 617–625
20. Anderson S, Halter JB, Hazzard WR *et al*. Prediction, progression, and outcomes of chronic kidney disease in older adults. *J Am Soc Nephrol* 2009; 20: 1199–1209
21. Roderick PJ, Atkins RJ, Smeeth L *et al*. Detecting chronic kidney disease in older people; what are the implications? *Age Ageing* 2008; 37: 179–186
22. Crowe E, Halpin D, Stevens P. Early identification and management of chronic kidney disease: summary of NICE guidance. *BMJ* 2008; 337: a1530
23. K/DOQI clinical practice guidelines on hypertension and antihypertensive agents in chronic kidney disease. *Am J Kidney Dis* 2004; 43: S1–S290
24. KDOQI Clinical Practice Guideline and Clinical Practice Recommendations for anemia in chronic kidney disease: 2007 update of hemoglobin target. *Am J Kidney Dis* 2007; 50: 471–530
25. Moranne O, Froissart M, Rossert J *et al*. Timing of onset of CKD-related metabolic complications. *J Am Soc Nephrol* 2009; 20: 164–171
26. Ferrari P, Xiao J, Ukich A *et al*. Estimation of glomerular filtration rate: does haemoglobin discriminate between ageing and true CKD? *Nephrol Dial Transplant* 2009; 24: 1828–1833
27. Lindeman RD, Tobin J, Shock NW. Longitudinal studies on the rate of decline in renal function with age. *J Am Geriatr Soc* 1985; 33: 278–285
28. Hemmelgarn BR, Zhang J, Manns BJ *et al*. Progression of kidney dysfunction in the community-dwelling elderly. *Kidney Int* 2006; 69: 2155–2161
29. Rifkin DE, Shlipak MG, Katz R *et al*. Rapid kidney function decline and mortality risk in older adults. *Arch Intern Med* 2008; 168: 2212–2218
30. Fried LP, Kronmal RA, Newman AB *et al*. Risk factors for 5-year mortality in older adults: the Cardiovascular Health Study. *JAMA* 1998; 279: 585–592
31. Go AS, Chertow GM, Fan D *et al*. Chronic kidney disease and the risks of death, cardiovascular events, and hospitalization. *N Engl J Med* 2004; 351: 1296–1305
32. Shlipak MG, Sarnak MJ, Katz R *et al*. Cystatin C and the risk of death and cardiovascular events among elderly persons. *N Engl J Med* 2005; 352: 2049–2060
33. Hwang SJ, Lin MY, Chen HC *et al*. Increased risk of mortality in the elderly population with late-stage chronic kidney disease: a cohort study in Taiwan. *Nephrol Dial Transplant* 2008; 23: 3192–3198
34. Roderick PJ, Atkins RJ, Smeeth L *et al*. CKD and mortality risk in older people: a community-based population study in the United Kingdom. *Am J Kidney Dis* 2009; 53: 950–960
35. Eriksen BO, Ingebrechtsen OC. The progression of chronic kidney disease: a 10-year population-based study of the effects of gender and age. *Kidney Int* 2006; 69: 375–382
36. O'Hare AM, Choi AI, Bertenthal D *et al*. Age affects outcomes in chronic kidney disease. *J Am Soc Nephrol* 2007; 18: 2758–2765
37. Hallan S, Astor B, Romundstad S *et al*. Association of kidney function and albuminuria with cardiovascular mortality in older vs younger individuals: the HUNT II Study. *Arch Intern Med* 2007; 167: 2490–2496
38. Raymond NT, Zehnder D, Smith SC *et al*. Elevated relative mortality risk with mild-to-moderate chronic kidney disease decreases with age. *Nephrol Dial Transplant* 2007; 22: 3214–3220
39. Matsushita K, van der Velde M, Astor BC *et al*. Association of estimated glomerular filtration rate and albuminuria with all-cause and cardiovascular mortality in general population cohorts: a collaborative meta-analysis. *Lancet* 2010; 375: 2073–2081
40. Levey AS, Stevens LA, Schmid CH *et al*. A new equation to estimate glomerular filtration rate. *Ann Intern Med* 2009; 150: 604–612
41. Levey AS, Coresh J, Greene T *et al*. Using standardized serum creatinine values in the modification of diet in renal disease study equation for estimating glomerular filtration rate. *Ann Intern Med* 2006; 145: 247–254
42. Matsushita K, Selvin E, Bash LD *et al*. Risk implications of the new CKD Epidemiology Collaboration (CKD-EPI) equation compared with the MDRD Study equation for estimated GFR: the Atherosclerosis Risk in Communities (ARIC) Study. *Am J Kidney Dis* 2010; 55: 648–659
43. Vascular factors and risk of dementia: design of the Three-City Study and baseline characteristics of the study population. *Neuroepidemiology* 2003; 22: 316–325
44. WHO Collaborating Centre for Drug Statistics Methodology. *ATC/DDD Index, 2009* www.whooc.no/atc\_ddd\_index/
45. Chobanian AV, Bakris GL, Black HR *et al*. The seventh report of the Joint National Committee on Prevention, Detection, Evaluation, and Treatment of High Blood Pressure: the JNC 7 report. *JAMA* 2003; 289: 2560–2572
46. Levey AS, de Jong PE, Coresh J *et al*. The definition, classification and prognosis of chronic kidney disease: a KDIGO Controversies Conference report. *Kidney Int* 2010 Dec 8. [Epub ahead of print]
47. Alperovitch A, Bertrand M, Jouglu E *et al*. Do we really know the cause of death of the very old? Comparison between official mortality statistics and cohort study classification. *Eur J Epidemiol* 2009; 24: 669–675
48. Bland JM, Altman DG. Regression towards the mean. *BMJ* 1994; 308: 1499
49. Barnett AG, van der Pols JC, Dobson AJ. Regression to the mean: what it is and how to deal with it. *Int J Epidemiol* 2005; 34: 215–220
50. John R, Webb M, Young A *et al*. Unreferred chronic kidney disease: a longitudinal study. *Am J Kidney Dis* 2004; 43: 825–835
51. Shlipak MG, Katz R, Kestenbaum B *et al*. Rapid decline of kidney function increases cardiovascular risk in the elderly. *J Am Soc Nephrol* 2009; 20: 2625–2630
52. O'Hare AM, Bertenthal D, Covinsky KE *et al*. Mortality risk stratification in chronic kidney disease: one size for all ages? *J Am Soc Nephrol* 2006; 17: 846–853
53. Brantsma AH, Bakker SJ, Hillege HL *et al*. Cardiovascular and renal outcome in subjects with K/DOQI stage 1-3 chronic kidney disease: the importance of urinary albumin excretion. *Nephrol Dial Transplant* 2008; 23: 3851–3858
54. Hemmelgarn BR, Manns BJ, Lloyd A *et al*. Relation between kidney function, proteinuria, and adverse outcomes. *JAMA* 2010; 303: 423–429
55. KDOQI Clinical Practice Guidelines and Clinical Practice Recommendations for Diabetes and Chronic Kidney Disease. *Am J Kidney Dis* 2007; 49: S12–S154
56. O'Hare AM, Kaufman JS, Covinsky KE *et al*. Current guidelines for using angiotensin-converting enzyme inhibitors and angiotensin II-receptor antagonists in chronic kidney disease: is the evidence base relevant to older adults? *Ann Intern Med* 2009; 150: 717–724
57. Castro AF, Coresh J. CKD surveillance using laboratory data from the population-based National Health and Nutrition Examination Survey (NHANES). *Am J Kidney Dis* 2009; 53: S46–S55
58. Tonelli M, Gill J, Pandeya S *et al*. Barriers to blood pressure control and angiotensin enzyme inhibitor use in Canadian patients with chronic renal insufficiency. *Nephrol Dial Transplant* 2002; 17: 1426–1433
59. Sarafidis PA, Li S, Chen SC *et al*. Hypertension awareness, treatment, and control in chronic kidney disease. *Am J Med* 2008; 121: 332–340
60. Plantinga LC, Miller ER 3rd, Stevens LA *et al*. Blood pressure control among persons without and with chronic kidney disease: US trends and risk factors 1999–2006. *Hypertension* 2009; 54: 47–56

Received for publication: 31.1.11; Accepted in revised form: 9.5.11
